# Supplementary material
Source: MDPI journal article supplement (https://www.mdpi.com/2076-3417/13/11/6635)
Supplement: s1 [file s1 › applsci-2385405-supplementary.pdf]

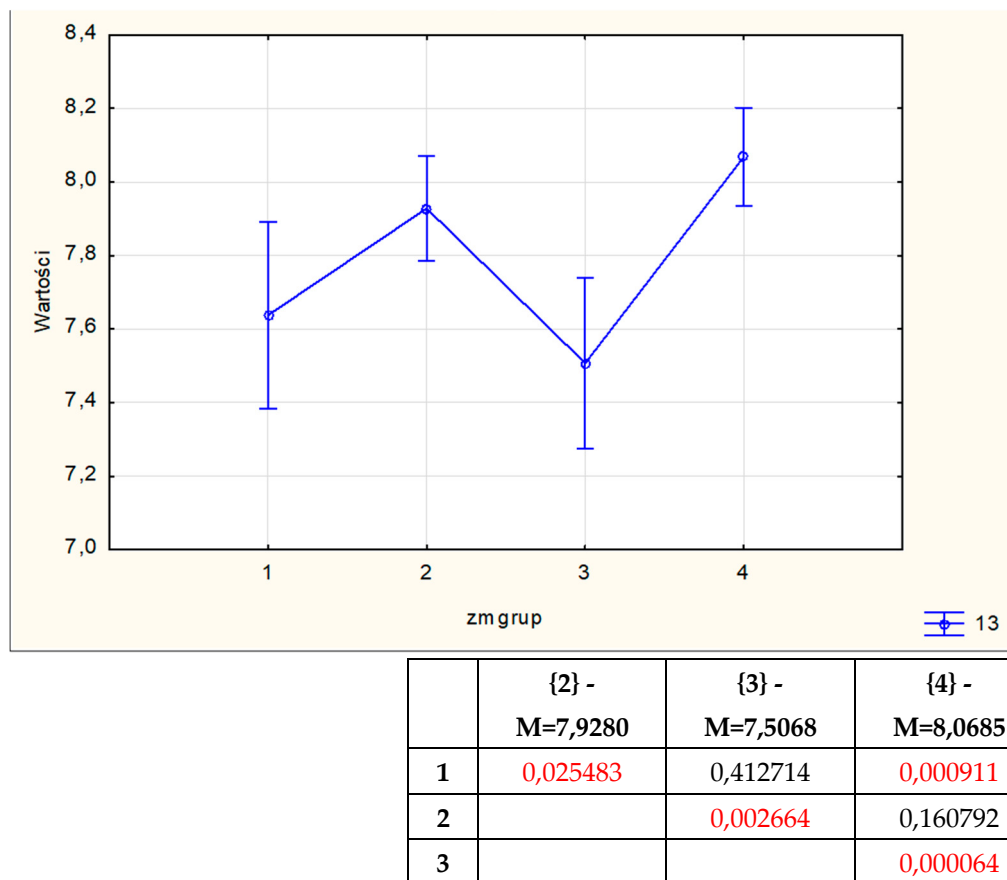

Figure S1. The comparison between the widths of teeth 13 between the boys (group 1 – R-CLP, group 2 – L-CLP, group 3 – BCLP, group 4 – healthy individuals). Statistically significant values were presented in red

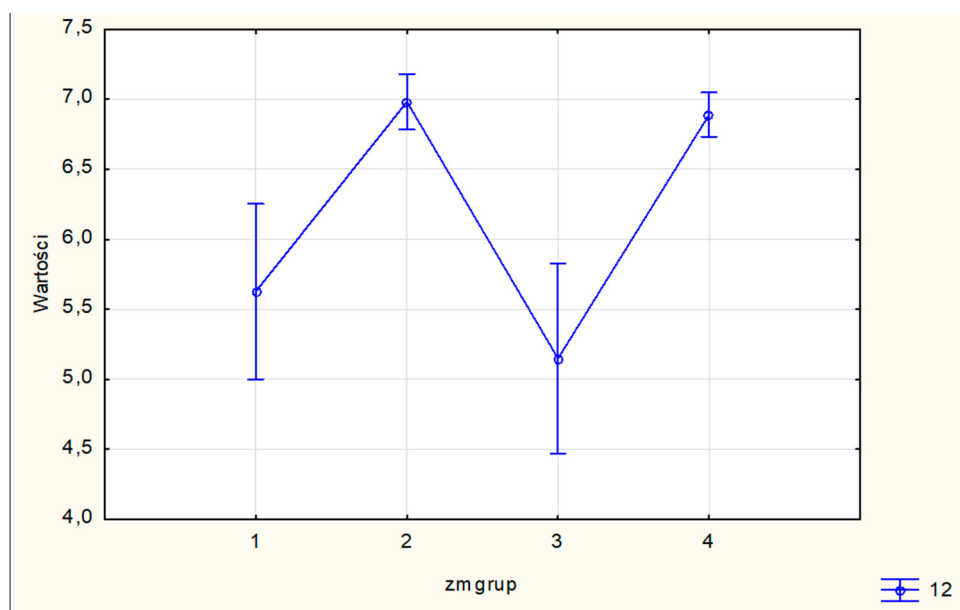

|   | {2} -<br>M=6,9818 | {3} -<br>M=5,1492 | {4} -<br>M=6,8906 |
|---|-------------------|-------------------|-------------------|
| 1 | 0,000000          | 0,103731          | 0,000000          |
| 2 |                   | 0,000000          | 0,528967          |
| 3 |                   |                   | 0,000000          |

Figure S2. The comparison between the widths of teeth 12 between the boys (group 1 – R-CLP, group 2 – L-CLP, group 3 – BCLP, group 4 – healthy individuals. Statistically significant values were presented in red

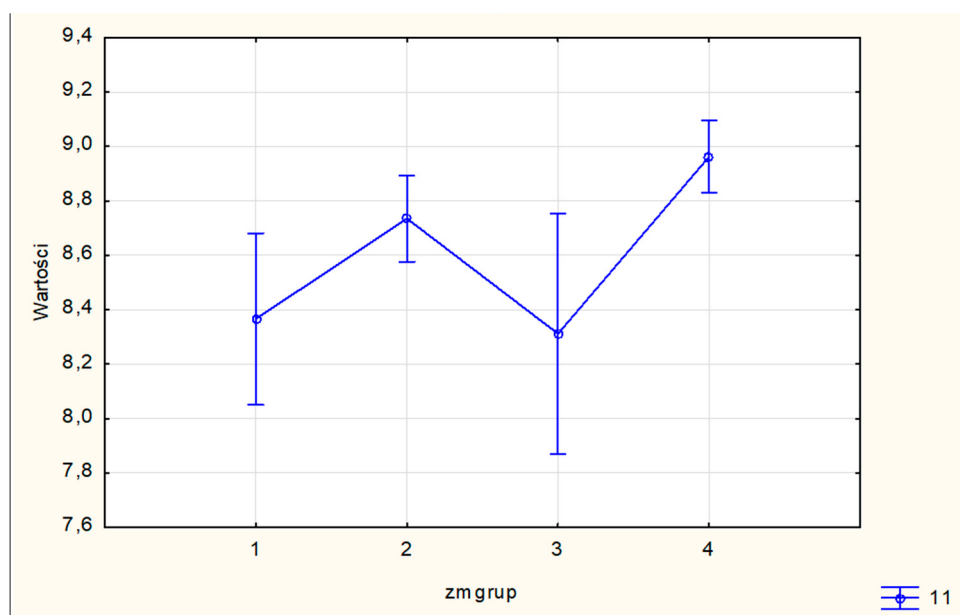

|  | {2} -<br>M=8,7347 | {3} -<br>M=8,3116 | {4} -<br>M=8,9625 |
|--|-------------------|-------------------|-------------------|
|--|-------------------|-------------------|-------------------|

|   |          |          |          |
|---|----------|----------|----------|
| 1 | 0,022089 | 0,781389 | 0,000227 |
| 2 |          | 0,011511 | 0,058681 |
| 3 |          |          | 0,000110 |

Figure S3. The comparison between the widths of teeth 11 between the boys (group 1 – R-CLP, group 2 – L-CLP, group 3 – BCLP, group 4 – healthy individuals. Statistically significant values were presented in red

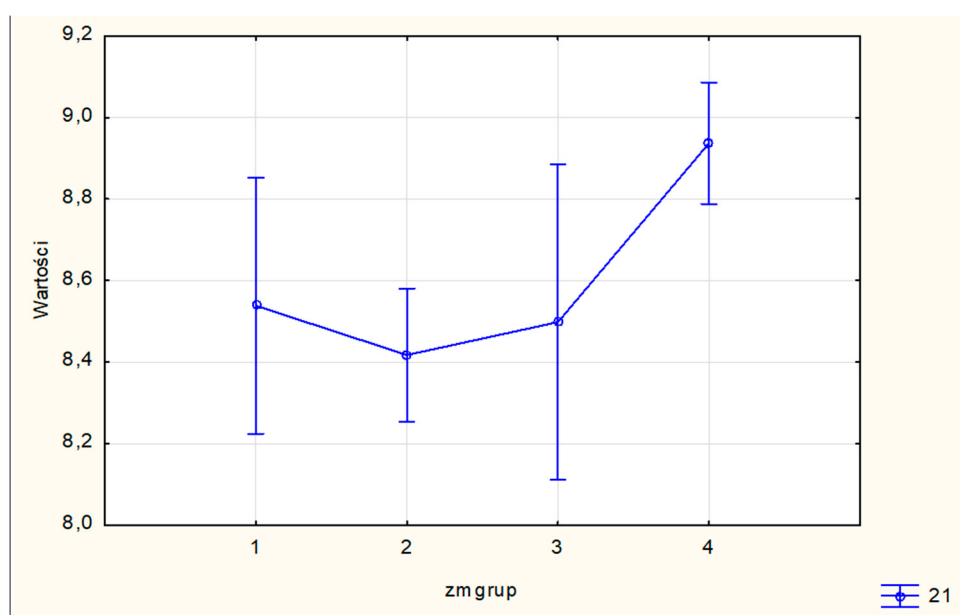

|   | {2} -<br>M=8,4176 | {3} -<br>M=8,4984 | {4} -<br>M=8,9373 |
|---|-------------------|-------------------|-------------------|
| 1 | 0,442692          | 0,835472          | 0,011164          |
| 2 |                   | 0,631742          | 0,000037          |
| 3 |                   |                   | 0,009175          |

Figure S4. The comparison between the widths of teeth 21 between the boys (group 1 – R-CLP, group 2 – L-CLP, group 3 – BCLP, group 4 – healthy individuals. Statistically significant values were presented in red

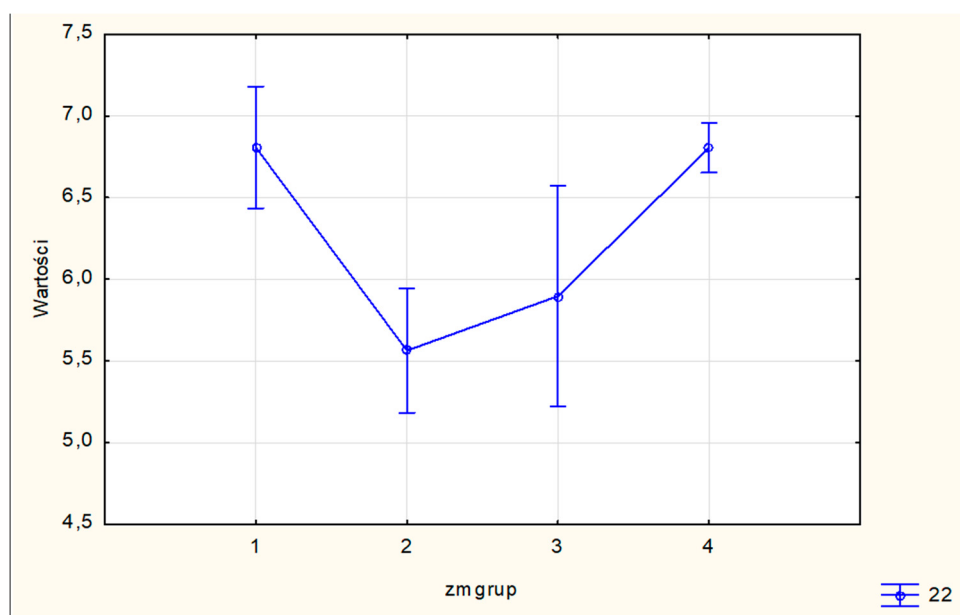

|   | {2} -<br>M=5,5643 | {3} -<br>M=5,8975 | {4} -<br>M=6,8056 |
|---|-------------------|-------------------|-------------------|
| 1 | 0,000000          | 0,005623          | 0,993564          |
| 2 |                   | 0,271458          | 0,000000          |
| 3 |                   |                   | 0,002027          |

Figure S5. The comparison between the widths of teeth 22 between the boys (group 1 – R-CLP, group 2 – L-CLP, group 3 – BCLP, group 4 – healthy individuals. Statistically significant values were presented in red

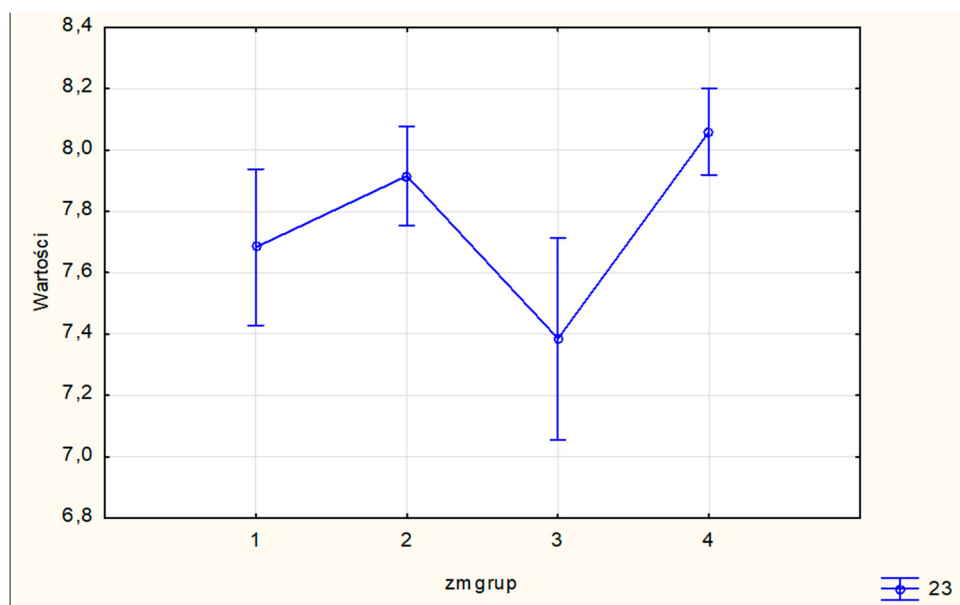

|   | {2} -<br>M=7,9151 | {3} -<br>M=7,3850 | {4} -<br>M=8,0598 |
|---|-------------------|-------------------|-------------------|
| 1 | 0,105035          | 0,090111          | 0,007228          |
| 2 |                   | 0,000811          | 0,198508          |
| 3 |                   |                   | 0,000016          |

Figure S6. The comparison between the widths of teeth 23 between the boys (group 1 – R-CLP, group 2 – L-CLP, group 3 – BCLP, group 4 – healthy individuals). Statistically significant values were presented in red

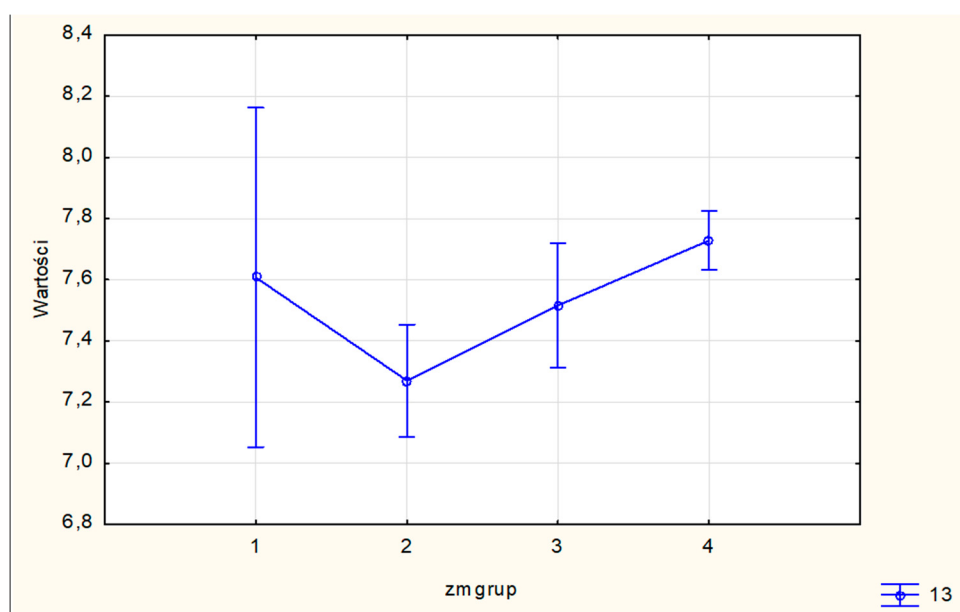

|   | {2} - M=7,2700 | {3} - M=7,5156 | {4} - M=7,7285 |
|---|----------------|----------------|----------------|
| 1 | 0,081498       | 0,666299       | 0,504214       |
| 2 |                | 0,099507       | 0,000005       |
| 3 |                |                | 0,110729       |

Figure S7. The comparison between the widths of teeth 13 between the girls (group 1 – R-CLP, group 2 – L-CLP, group 3 – BCLP, group 4 – healthy individuals). Statistically significant values were presented in red

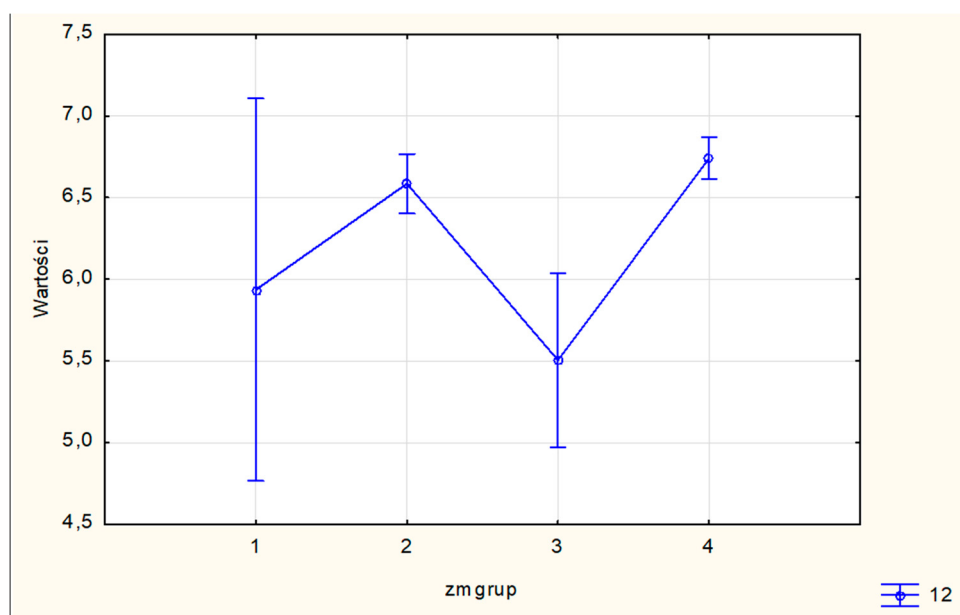

|   | {2} - M=8,2086 | {3} - M=8,2029 | {4} - M=8,6181 |
|---|----------------|----------------|----------------|
| 1 | 0,706336       | 0,748043       | 0,023961       |
| 2 |                | 0,974083       | 0,000532       |
| 3 |                |                | 0,008528       |

Figure S8. The comparison between the widths of teeth 12 between the girls (group 1 – R-CLP, group 2 – L-CLP, group 3 – BCLP, group 4 – healthy individuals. Statistically significant values were presented in red

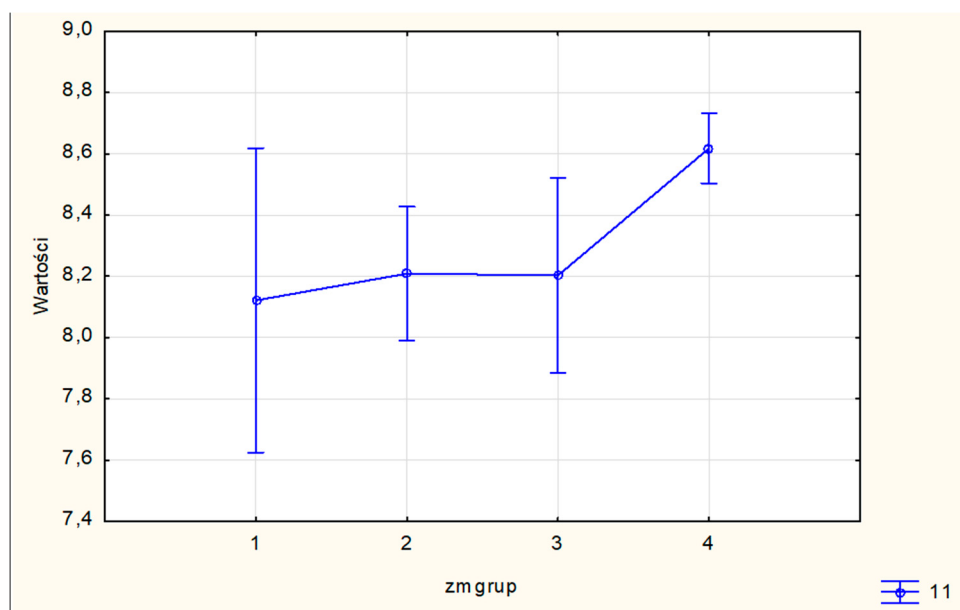

|   | {2} -<br>M=8,2086 | {3} -<br>M=8,2029 | {4} -<br>M=8,6181 |
|---|-------------------|-------------------|-------------------|
| 1 | 0,706336          | 0,748043          | 0,023961          |
| 2 |                   | 0,974083          | 0,000532          |
| 3 |                   |                   | 0,008528          |

Figure S9. The comparison between the widths of teeth 11 between the girls (group 1 – R-CLP, group 2 – L-CLP, group 3 – BCLP, group 4 – healthy individuals). Statistically significant values were presented in red

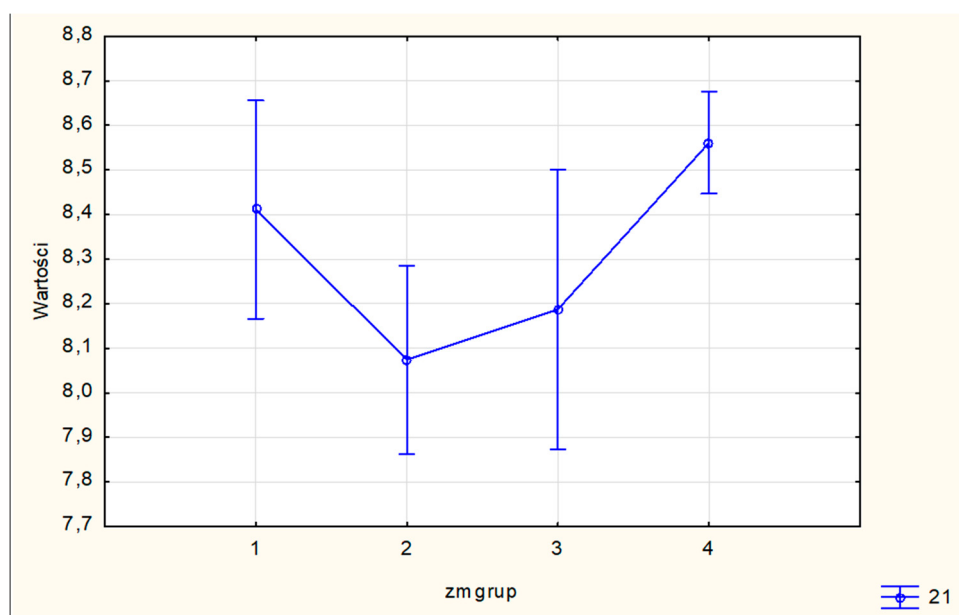

|   | {2} -<br>M=8,0741 | {3} -<br>M=8,1876 | {4} -<br>M=8,5614 |
|---|-------------------|-------------------|-------------------|
| 1 | 0,134549          | 0,361894          | 0,475537          |
| 2 |                   | 0,503748          | 0,000033          |
| 3 |                   |                   | 0,013841          |

Figure S10. The comparison between the widths of teeth 21 between the girls (group 1 – R-CLP, group 2 – L-CLP, group 3 – BCLP, group 4 – healthy individuals). Statistically significant values were presented in red

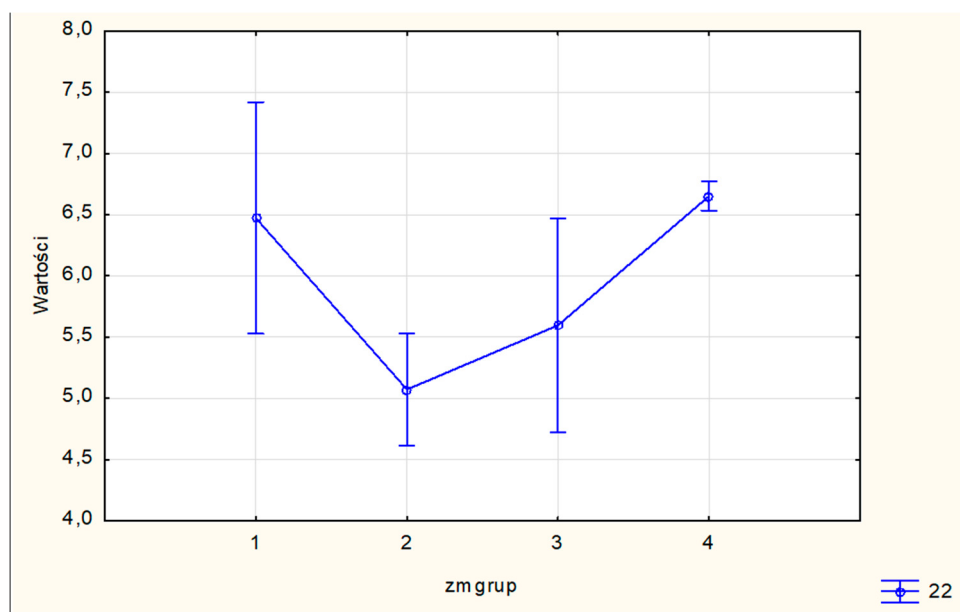

|   | {2} -<br>M=5,0725 | {3} -<br>M=5,5964 | {4} -<br>M=6,6523 |
|---|-------------------|-------------------|-------------------|
| 1 | 0,000184          | 0,023475          | 0,579970          |
| 2 |                   | 0,061072          | 0,000000          |
| 3 |                   |                   | 0,000008          |

**Figure S11.** The comparison between the widths of teeth 22 between the girls (group 1 – R-CLP, group 2 – L-CLP, group 3 – BCLP, group 4 – healthy individuals. Statistically significant values were presented in red

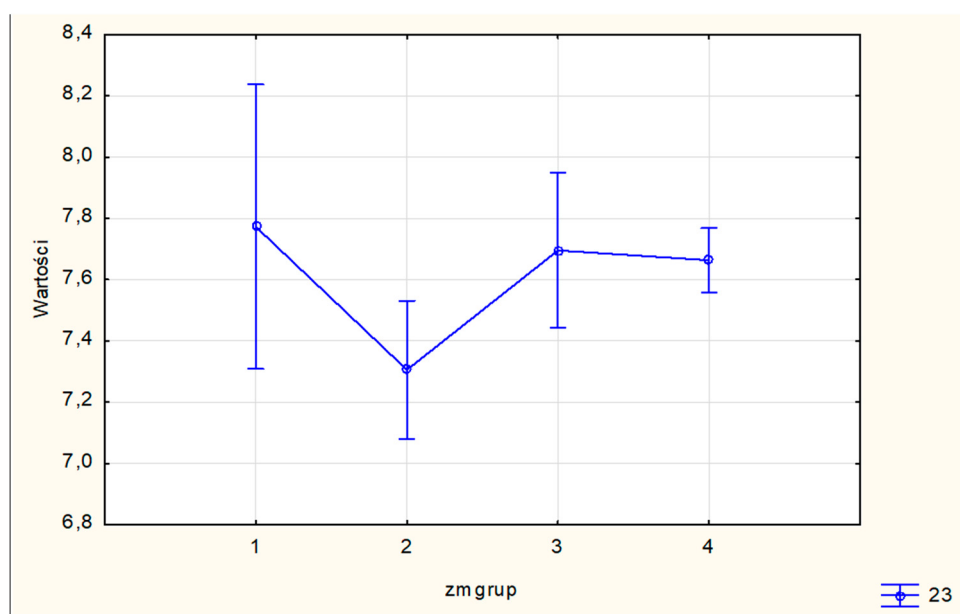

|   | {2} -<br>M=7,3054 | {3} -<br>M=7,6953 | {4} -<br>M=7,6630 |
|---|-------------------|-------------------|-------------------|
| 1 | 0,032282          | 0,744529          | 0,590436          |
| 2 |                   | 0,018035          | 0,001274          |
| 3 |                   |                   | 0,824340          |

**Figure S12.** The comparison between the widths of teeth 23 between the girls (group 1 – R-CLP, group 2 – L-CLP, group 3 – BCLP, group 4 – healthy individuals. Statistically significant values were presented in red
